# Supplementary material for: An annual 30 m cultivated pasture dataset of the Tibetan Plateau from 1988 to 2021
Source: Copernicus journal article supplement (doi:10.5194/essd-2024-620), 2025-01-16
Supplement: Supplementary file 1 [file essd-2024-620-supplement.pdf]

*Supplement of*

**An annual 30 m cultivated pasture dataset of the Tibetan Plateau  
from 1988 to 2021**

**Han et al.**

*Correspondence to: Jin-Sheng He (jshe@pku.edu.cn) and Jian Bi (bijian@lzu.edu.cn)*

The copyright of individual parts of the supplement might differ from the article license.

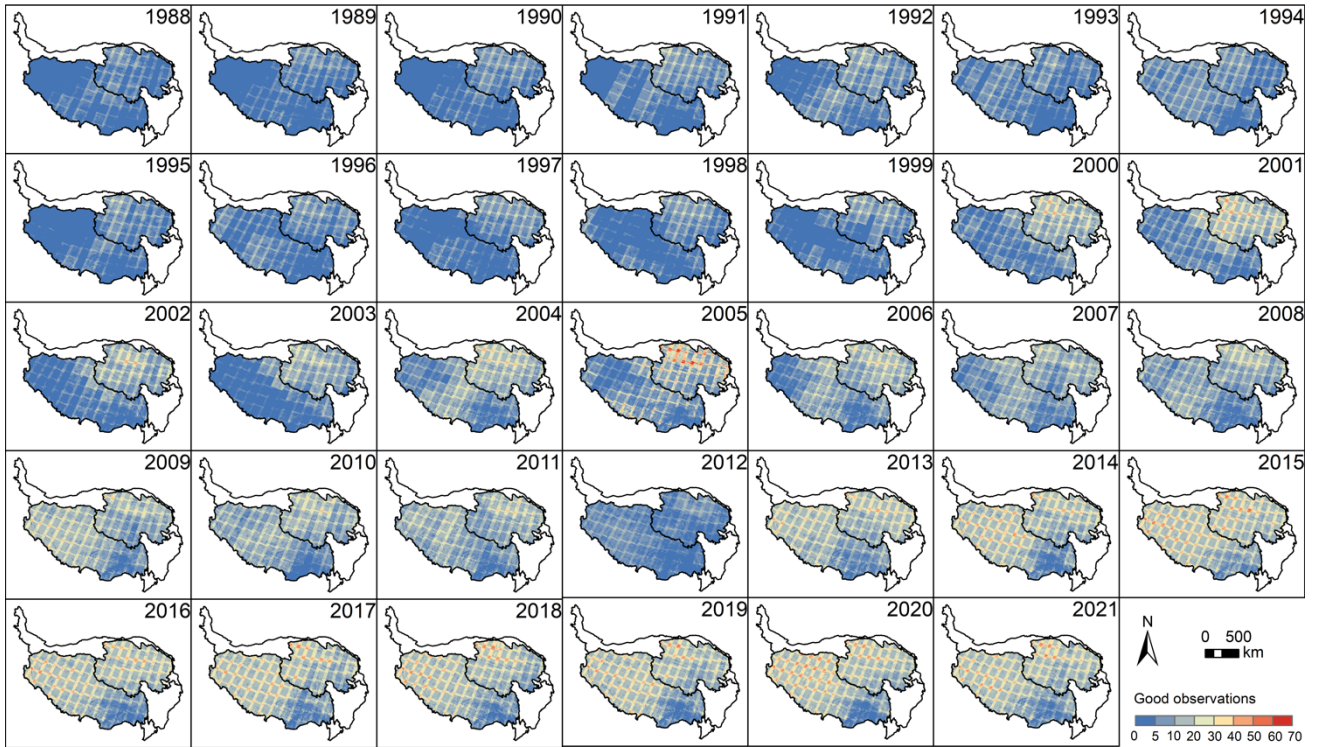

**Figure S1.** Number of good observations from Landsat satellite sensors in the growing season from 1988 to 2021 for Qinghai Province and the Tibet Autonomous Region.

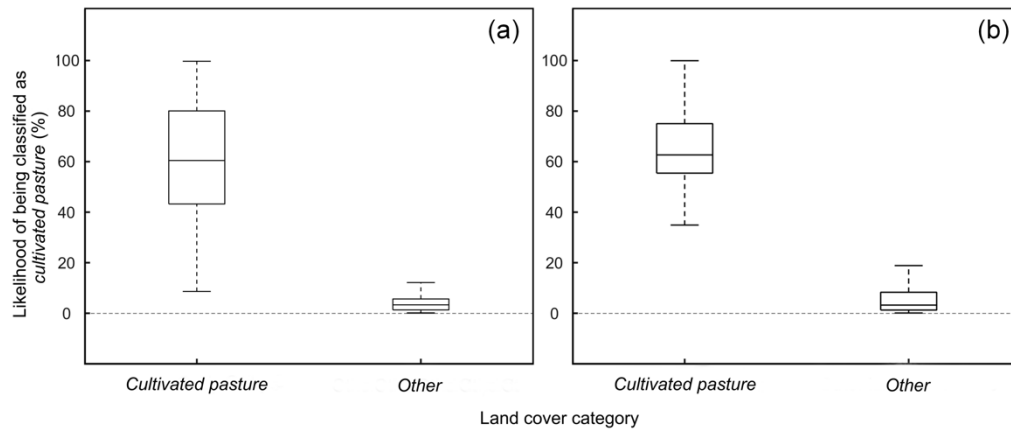

**Figure S2.** The likelihood of *cultivated pasture* and *other* being classified as *cultivated pasture* in the pilot study regions of (a) Qinghai Province and (b) the Tibet Autonomous Region. The binary RF classification model has a decent ability to discriminate *cultivated pasture* from *other*.

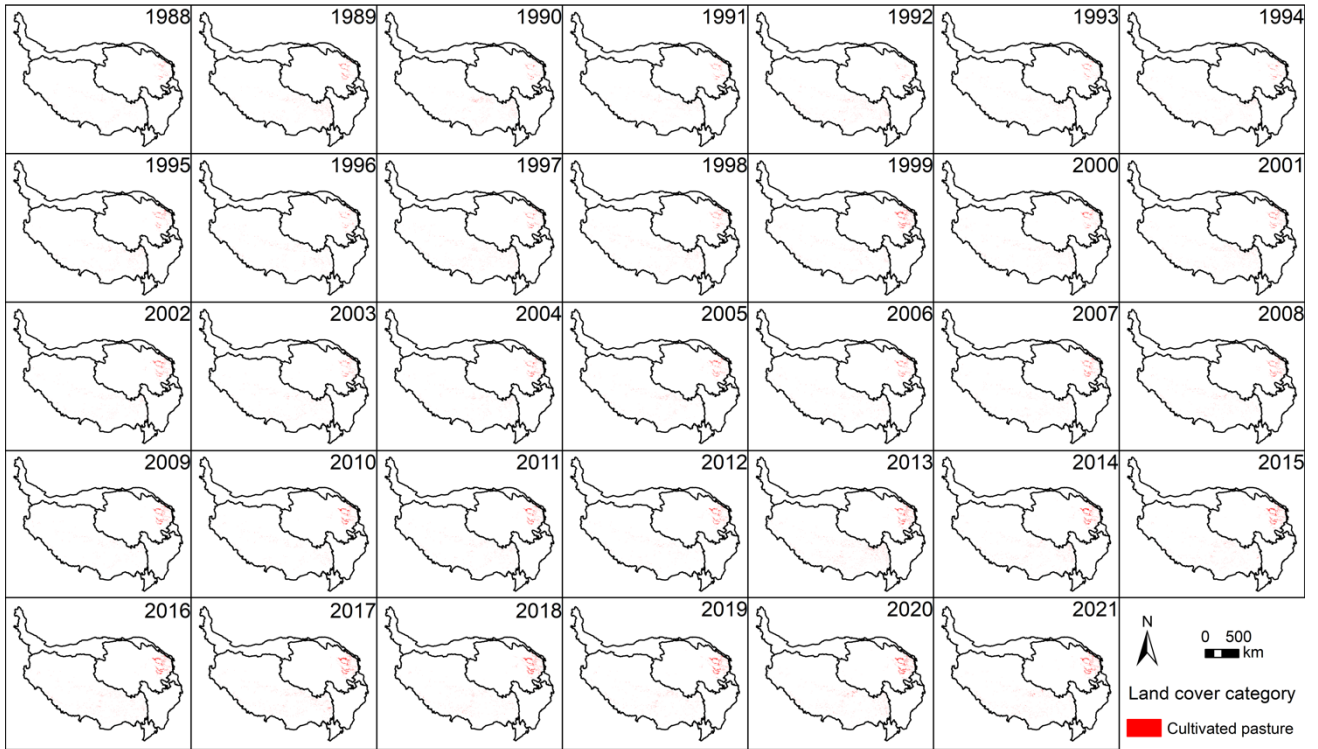

**Figure S3.** Annual spatial distributions of cultivated pastures in Qinghai Province and the Tibet Autonomous Region from 1988 to 2021.

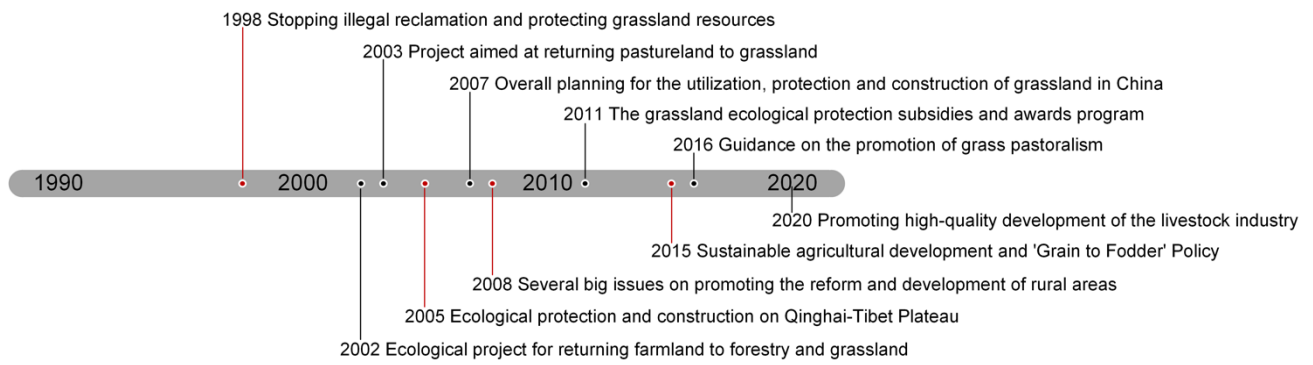

**Figure S4.** China's major policies related to cultivated pastures from 1990 to 2022.

**Table S1.** Comparison of the areas of cultivated pastures mapped using remote sensing against those from the government statistics at the county level for 2021. The government statistics of cultivated pasture areas were from the Qinghai Province Bureau of Forestry and Grassland as well as the Bureau of Agriculture and Rural Affairs of the Tibet Autonomous Region.

| <b>County</b>               | <b>Government statistics<br/>(10<sup>4</sup> ha)</b> | <b>Remote sensing<br/>(10<sup>4</sup> ha)</b> |
|-----------------------------|------------------------------------------------------|-----------------------------------------------|
| Qinghai Province            |                                                      |                                               |
| Xunhua                      | 7.93                                                 | 1.60                                          |
| Gonghe                      | 18.04                                                | 18.34                                         |
| Guide                       | 3.63                                                 | 4.46                                          |
| Xinghai                     | 15.00                                                | 8.62                                          |
| Banma                       | 3.20                                                 | 0.28                                          |
| Menyuan                     | 13.88                                                | 8.64                                          |
| Qilian                      | 8.67                                                 | 8.37                                          |
| Gangcha                     | 11.47                                                | 12.73                                         |
| Dulan                       | 4.67                                                 | 1.65                                          |
| Wulan                       | 5.33                                                 | 1.75                                          |
| Tianjun                     | 6.56                                                 | 3.66                                          |
| Delingca                    | 3.43                                                 | 0.44                                          |
| Datong                      | 10.20                                                | 4.10                                          |
| The Tibet Autonomous Region |                                                      |                                               |
| Kangma                      | 3.41                                                 | 3.94                                          |
| Jiangzi                     | 1.10                                                 | 1.47                                          |
| Gangba                      | 0.38                                                 | 0.71                                          |
| Sajia                       | 2.56                                                 | 2.16                                          |
| Jilong                      | 0.68                                                 | 1.54                                          |
| Saga                        | 1.83                                                 | 2.57                                          |
| Angren                      | 0.92                                                 | 1.64                                          |
| Dingjie                     | 0.12                                                 | 0.87                                          |
| Lazi                        | 0.8                                                  | 1.45                                          |
| Dingri                      | 1.13                                                 | 1.28                                          |
| Bailang                     | 1.33                                                 | 0.99                                          |
| Nyalam                      | 1.07                                                 | 0.83                                          |

**Table S2.** Trend of cultivated pasture areas from 1988 to 2021 in each county of Qinghai Province and the Tibet Autonomous Region.

| County                      | Changing rate (ha/year) | County      | Changing rate (ha/year) | County        | Changing rate (ha/year) | County        | Changing rate (ha/year) |
|-----------------------------|-------------------------|-------------|-------------------------|---------------|-------------------------|---------------|-------------------------|
| Qinghai Province            |                         |             |                         |               |                         |               |                         |
| Gonghe                      | 5032                    | Guide       | 734                     | Dulan         | 225                     | Maduo         | 2                       |
| Gangcha                     | 4321                    | Datong      | 705                     | Wulan         | 205                     | Geermu        | 1                       |
| Guinan                      | 3900                    | Huangyuan   | 641                     | Maqin         | 128                     | Zaduo         | 1                       |
| Xinghai                     | 3078                    | Jianzha     | 419                     | Banma         | 99                      | Jiuzhi        | ~ 0                     |
| Tongde                      | 1813                    | Huzhu       | 414                     | Pingan        | 81                      | Chengduo      | ~ 0                     |
| Menyuan                     | 1383                    | Hualong     | 407                     | Minhe         | 60                      | Gande         | ~ 0                     |
| Haiyan                      | 1233                    | Zeku        | 379                     | Zhiduo        | 9                       | Dari          | ~ 0                     |
| Qilian                      | 1126                    | Ledu        | 371                     | Delingha      | 6                       | Nangqian      | ~ 0                     |
| Tianjun                     | 968                     | Huangzhong  | 337                     | Yushu         | 3                       | Xining        | ~ 0                     |
| Tongren                     | 776                     | Xunhua      | 249                     | Qumalai       | 3                       |               |                         |
| The Tibet Autonomous Region |                         |             |                         |               |                         |               |                         |
| Baqing                      | 445                     | Motuo       | 65                      | Cuomei        | 36                      | Nielamu       | 3                       |
| Naqu                        | 341                     | Rikeze      | 64                      | Angren        | 35                      | Dingjie       | 2                       |
| Biru                        | 244                     | Nanmulin    | 63                      | Dingqing      | 34                      | Luozha        | -5                      |
| Nima                        | 226                     | Gaer        | 60                      | Renbu         | 34                      | Milin         | -13                     |
| Zhongba                     | 179                     | Dazi        | 60                      | Cuoqin        | 33                      | Langxian      | -18                     |
| Linzhou                     | 145                     | Cuona       | 55                      | Gaize         | 33                      | Longzi        | -21                     |
| Nierong                     | 141                     | Sajia       | 53                      | Lasha         | 32                      | Changdu       | -22                     |
| Dangxiong                   | 129                     | Bange       | 49                      | Zuogong       | 26                      | Yadong        | -22                     |
| Gongjue                     | 1149                    | Mangkang    | 48                      | Bailang       | 24                      | Bianba        | -24                     |
| Chayu                       | 114                     | Nimu        | 48                      | Qushui        | 21                      | Gongbujiangda | -33                     |
| Suoxian                     | 113                     | Jilong      | 47                      | Shannan       | 21                      | Jiali         | -33                     |
| Saga                        | 108                     | Mozhugongka | 46                      | Duinongdeqing | 18                      | Shenzha       | -52                     |
| Langkazi                    | 104                     | Ritu        | 43                      | Sangri        | 17                      | Leiwuqi       | -64                     |
| Chaya                       | 101                     | Zharang     | 41                      | Qiongjiexian  | 16                      | Linzhi        | -68                     |
| Basu                        | 92                      | Kangma      | 41                      | Dingri        | 12                      | Luolong       | -92                     |
| Pulan                       | 91                      | Lazi        | 40                      | Gangba        | 6                       | Karuo         | -122                    |
| Geji                        | 91                      | Xietongmen  | 38                      | Jiazha        | 6                       |               |                         |
| Zhada                       | 88                      | Jiangzi     | 38                      | Bomi          | 5                       |               |                         |
| Anduo                       | 65                      | Gongga      | 37                      | Jiangda       | 5                       |               |                         |
